# Supplementary material for: Drosophila melanogaster Transcriptome Response to Different Wolbachia Strains
Source: MDPI journal article supplement (doi:10.3390/ijms242417411), 2023-12-12

Figure S1. Heat map of differentially expressed genes belonging to the “Proteolysis” functional group in flies infected with wMelPlus and wMelCS112 Wolbachia strains compared to uninfected flies. Uninfected\_1, Uninfected\_2, Uninfected\_3 – gene expression of the uninfected *Drosophila melanogaster* line; wMelCS112\_1, wMelCS112\_2, wMelCS112\_3 – the *Drosophila melanogaster* line infected with wMelCS112; wMelPlus\_1, wMelPlus\_2, wMelPlus\_3 – the *Drosophila melanogaster* line infected with wMelPlus. Genes were clustered using the linkage method. The heat maps were generated using the Python3 package seaborn.

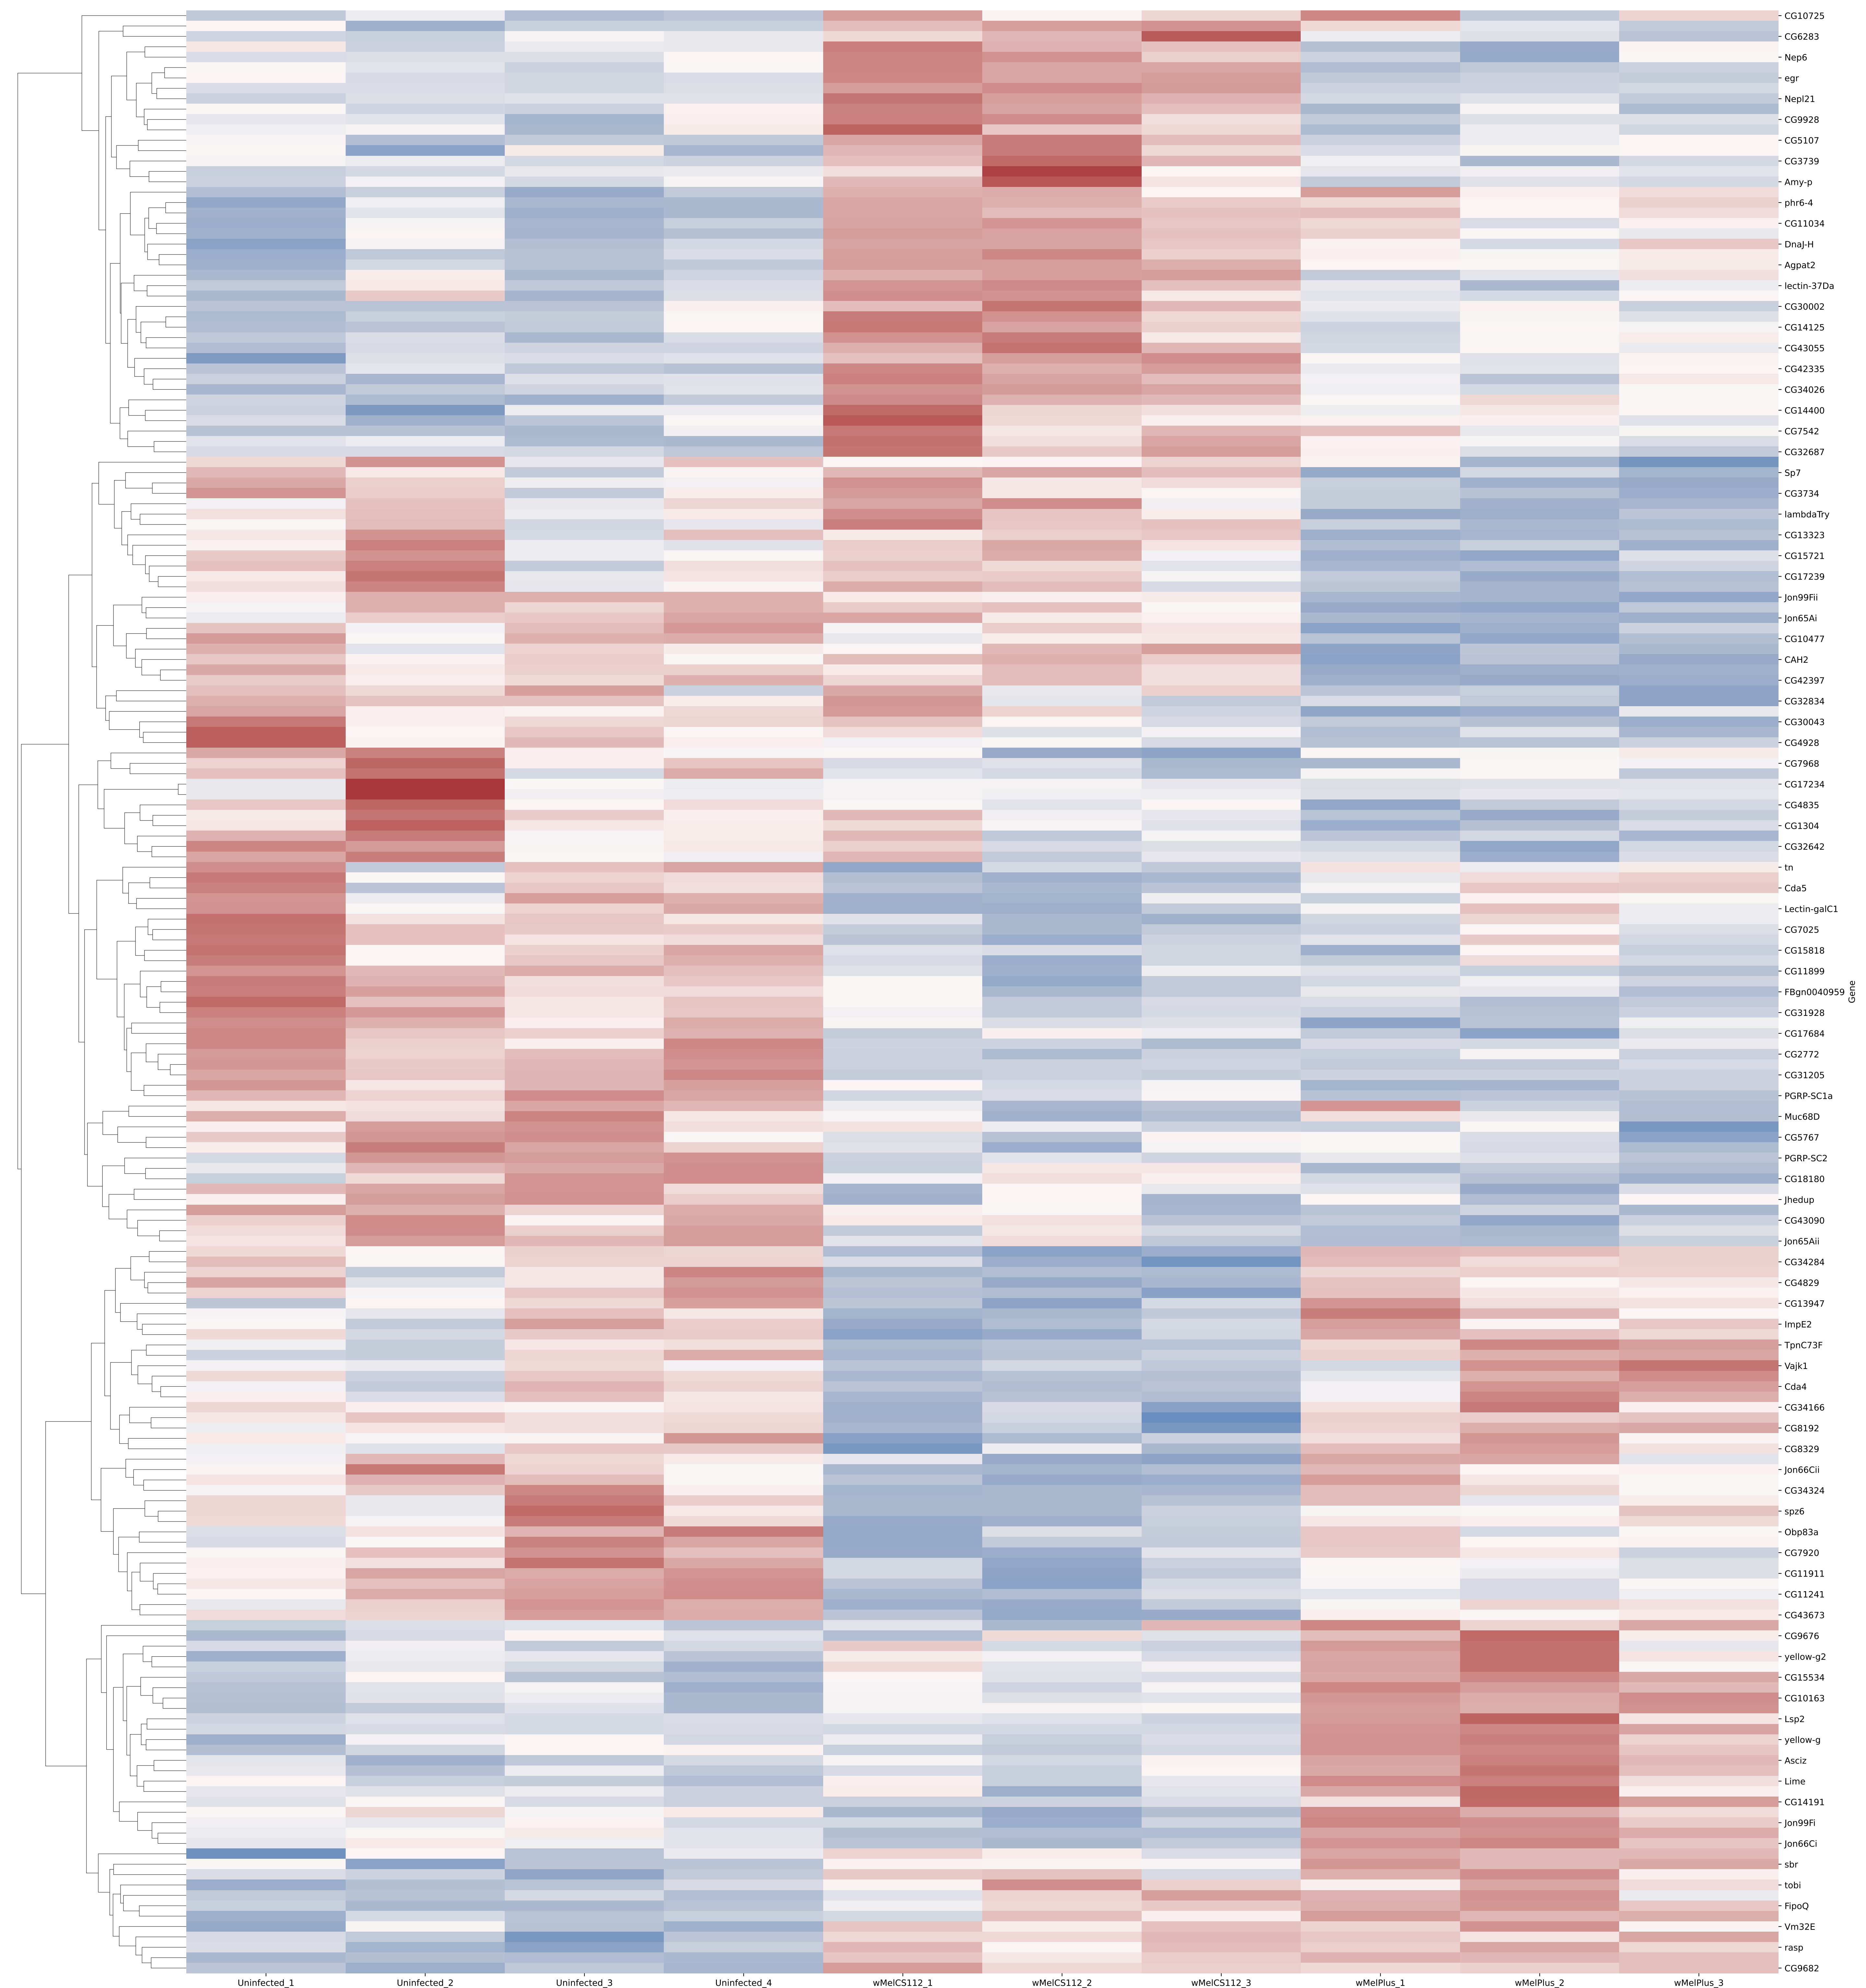

Supplement: s1 [file s1]
