# Supplementary material for: Drosophila melanogaster Transcriptome Response to Different Wolbachia Strains
Source: MDPI journal article supplement (doi:10.3390/ijms242417411), 2023-12-12
Supplement: s1 [file s1]

## Uninfected/wMelPlus 2

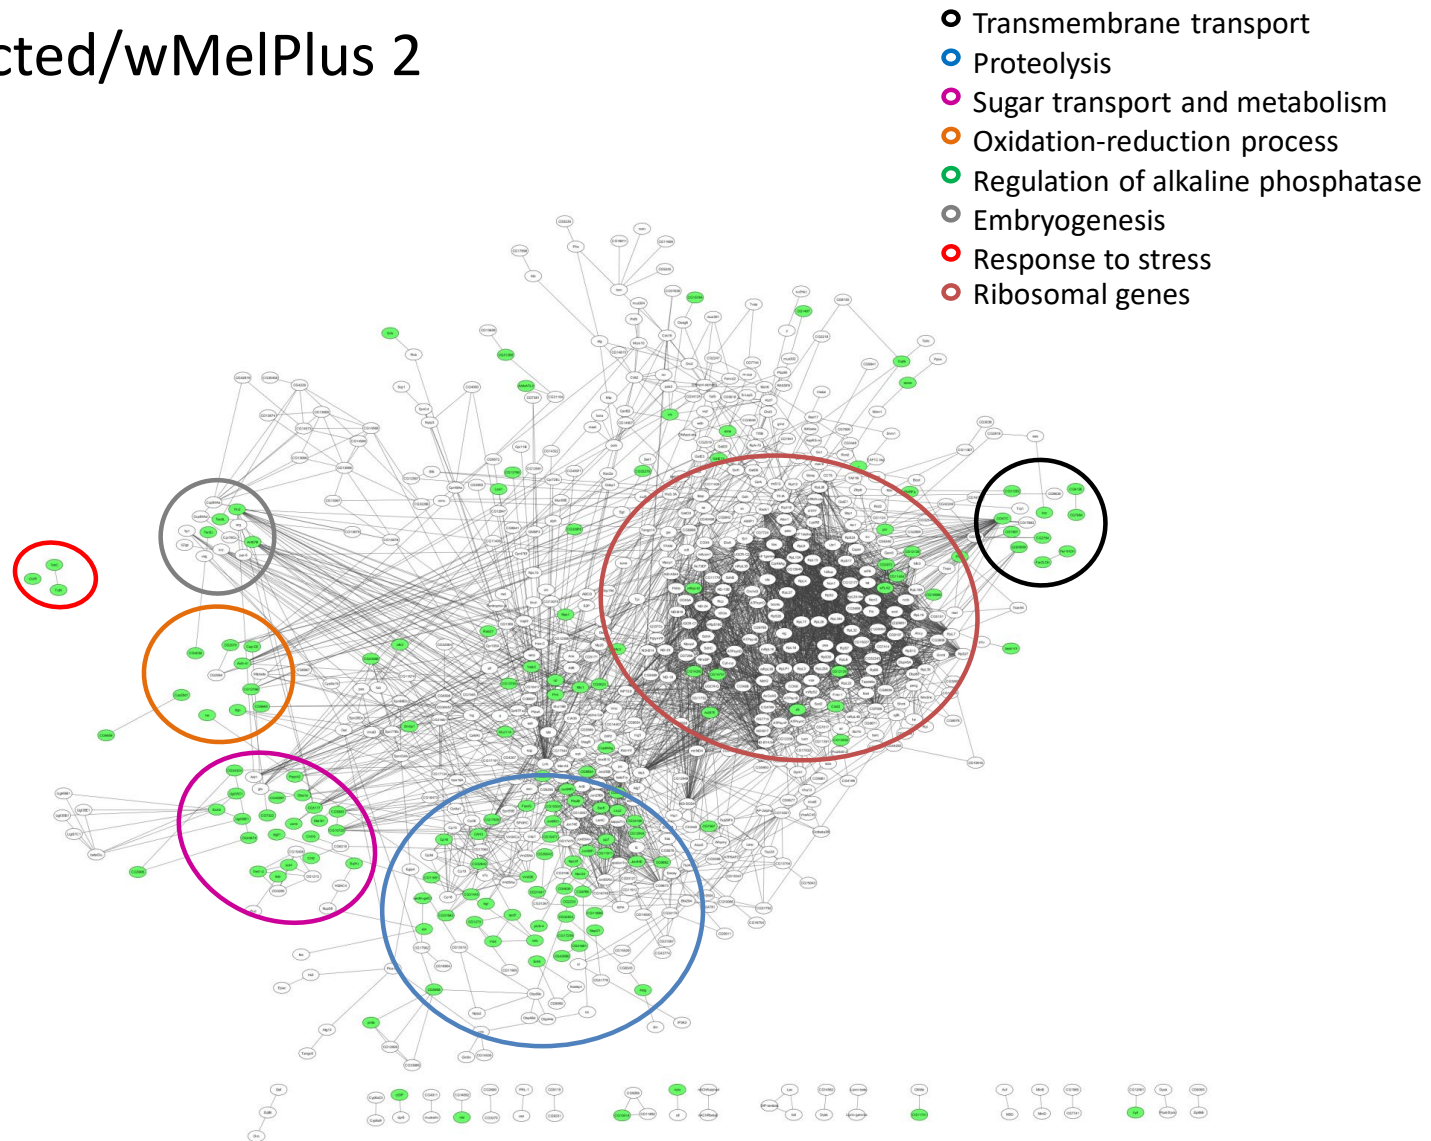

**Figure S2.** Gene networks for differentially expressed genes in wMelPlus-infected females compared to uninfected ones (second batch). The functional groups are enclosed in circles of different colors. The green color of the node shows genes, the expression of which was found to change in wMelPlus-infected females compared to uninfected ones in the first batch.
