# Supplementary material for: Drosophila melanogaster Transcriptome Response to Different Wolbachia Strains
Source: MDPI journal article supplement (doi:10.3390/ijms242417411), 2023-12-12
Supplement: s1 [file s1]

**Table S1.** Number of RNA-Seq reads mapped to the *Drosophila melanogaster* genome per sample in the second batch.

| Sample       | All reads (forward + reverse) | Assigned | Unassigned |
|--------------|-------------------------------|----------|------------|
| Uninfected_1 | 28471619                      | 28001382 | 470237     |
| Uninfected_2 | 28930877                      | 28552283 | 378594     |
| Uninfected_3 | 27038238                      | 26615511 | 422727     |
| Uninfected_4 | 26551383                      | 26131431 | 419952     |
| Uninfected_5 | 24876716                      | 24486820 | 389896     |
| wMelPlus_1   | 20895748                      | 20571335 | 324413     |
| wMelPlus_2   | 17600250                      | 17316110 | 284140     |
| wMelPlus_3   | 22547845                      | 22191248 | 356597     |
| wMelPlus_4   | 24449981                      | 24075216 | 374765     |
| wMelPlus_5   | 21501131                      | 21150899 | 350232     |
| wMelCS112_1  | 36077645                      | 35588928 | 488717     |
| wMelCS112_2  | 22140664                      | 21769083 | 371581     |
| wMelCS112_3  | 28841480                      | 28405479 | 436001     |
| wMelCS112_4  | 22998196                      | 22616043 | 382153     |
